# Supplementary material for: Facile fabrication of Y4(1,2-BDC)6(H2O)2·5H2O:Eu3+,Tb3+ ultralong nanobelts and tunable luminescence properties
Source: Royal Society of Chemistry journal article supplement (doi:10.1039/c2ce25350j), 2012-01-01
Supplement: c2ce25350j.pdf [file c2ce25350j.pdf]

## Supporting Information

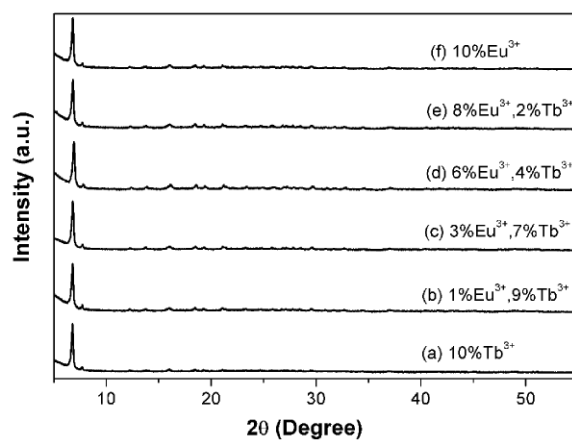

**Figure S1** XRD patterns of the Eu<sup>3+</sup>- and Tb<sup>3+</sup>-co-doped Y<sub>4</sub>(1,2-BDC)<sub>6</sub>(H<sub>2</sub>O)<sub>2</sub>·5H<sub>2</sub>O nanobelts

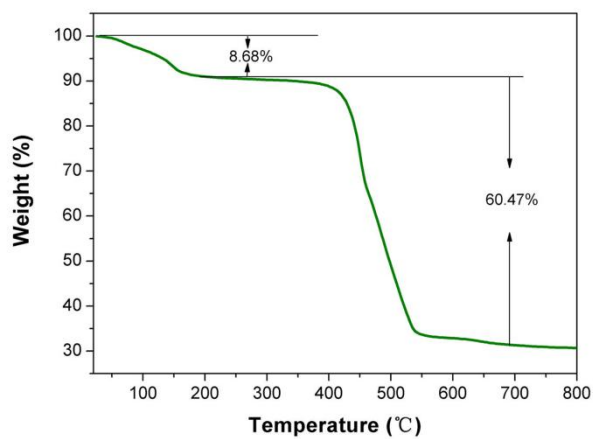

**Figure S2** TGA curve of the as-obtained Y<sub>4</sub>(1,2-BDC)<sub>6</sub>(H<sub>2</sub>O)<sub>2</sub>·5H<sub>2</sub>O nanobelts.

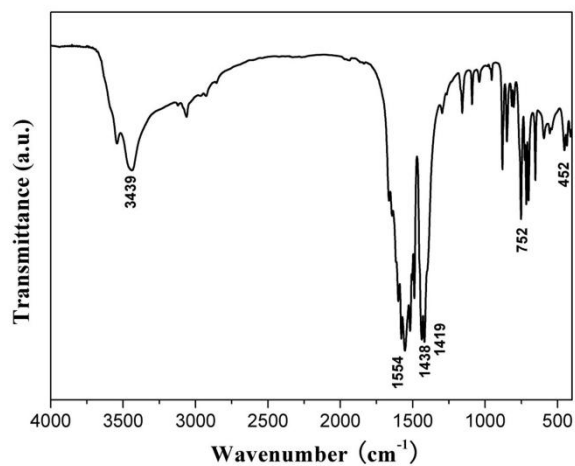

**Figure S3** FT-IR spectrum of sample  $Y_4(1,2\text{-BDC})_6(\text{H}_2\text{O})_2 \cdot 5\text{H}_2\text{O}$  nanobelts.

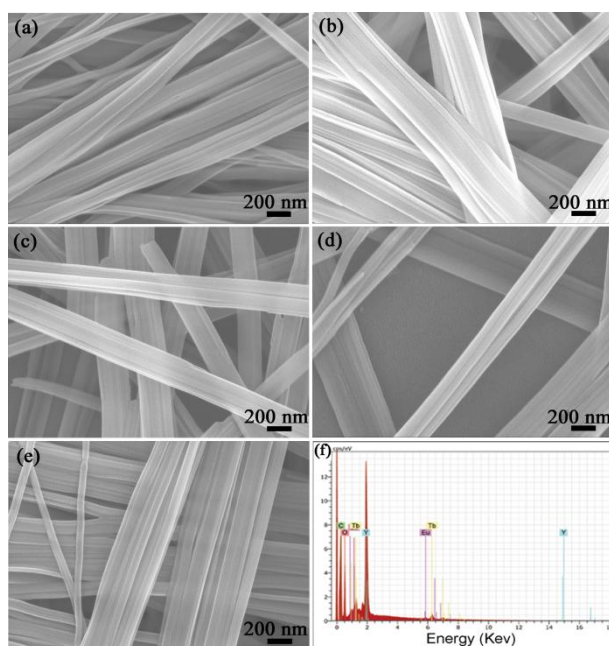

**Figure S4** SEM images at different magnifications of the  $\text{Tb}^{3+}$  and  $\text{Eu}^{3+}$  co-doped  $Y_4(1,2\text{-BDC})_6(\text{H}_2\text{O})_2 \cdot 5\text{H}_2\text{O}$  samples: (a) 10%  $\text{Tb}^{3+}$ ; (b) 1%  $\text{Eu}^{3+}$ , 9%  $\text{Tb}^{3+}$ ; (c) 6%  $\text{Eu}^{3+}$ , 4%  $\text{Tb}^{3+}$ ; (d) 10%  $\text{Eu}^{3+}$ ; (e) 2%  $\text{Eu}^{3+}$ , 8%  $\text{Tb}^{3+}$ ; and the EDX spectrum (f) of  $Y_4(1,2\text{-BDC})_6(\text{H}_2\text{O})_2 \cdot 5\text{H}_2\text{O} : 2\% \text{Eu}^{3+}, 8\% \text{Tb}^{3+}$  nanobelts.

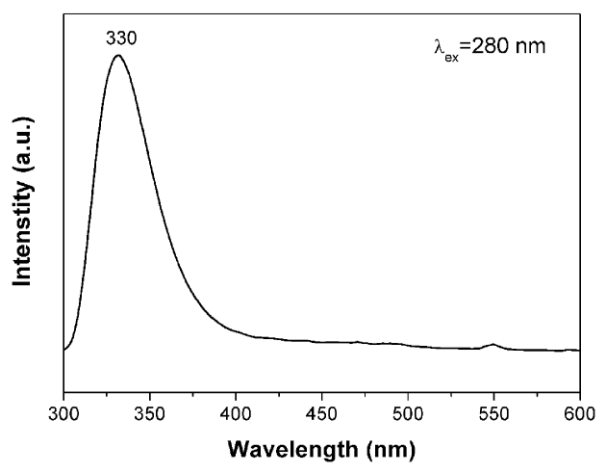

**Figure S5** Emission spectra of the  $Y_4(1,2-BDC)_6(H_2O)_2 \cdot 5H_2O$  nanobelts.
